# Supplementary material for: Stable and dynamic representations of value in the prefrontal cortex
Source: eLife journal article supplement (doi:10.7554/elife.54313), 2020-07-06

ANOVA value  $p=7.31e-04$   
ANOVA value:type  $p=0.21$   
linear value  $p=0.08$

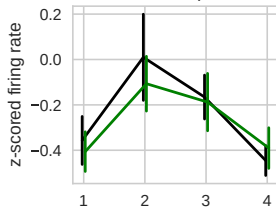

ANOVA value  $p=2.34e-03$   
ANOVA value:type  $p=0.61$   
linear value  $p=0.14$

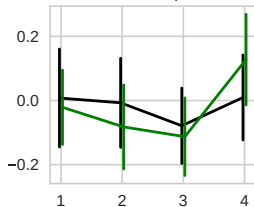

ANOVA value  $p=1.11e-03$   
ANOVA value:type  $p=0.1$   
linear value  $p=0.84$

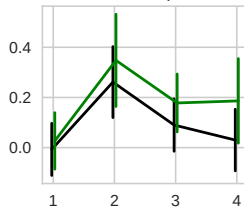

ANOVA value  $p=3.16e-05$   
ANOVA value:type  $p=0.11$   
linear value  $p=0.04$

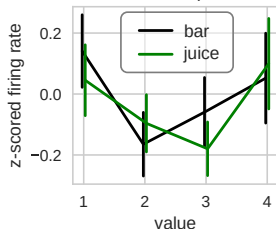

ANOVA value  $p=1.60e-08$   
ANOVA value:type  $p=0.12$   
linear value  $p=0.33$

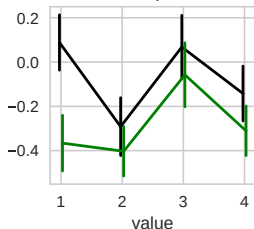

ANOVA value  $p=7.81e-03$   
ANOVA value:type  $p=0.6$   
linear value  $p=0.99$

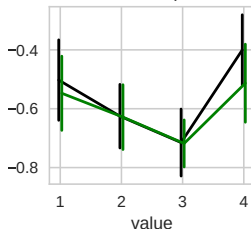

Supplement: supp [file elife-54313-supp-v1.zip]
