# Supplementary figures and images for: Stable and dynamic representations of value in the prefrontal cortex
Source: eLife journal article supplement (doi:10.7554/elife.54313), 2020-07-06

OFC

A

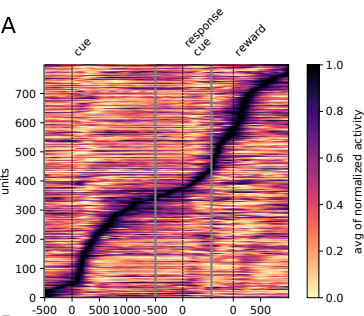

B

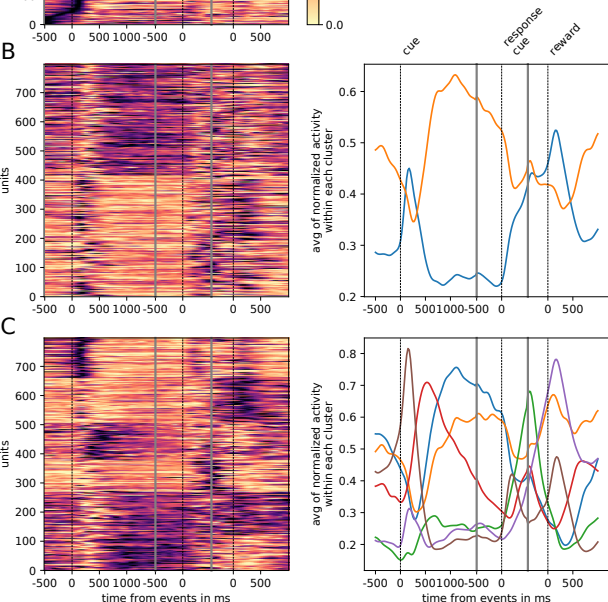

C

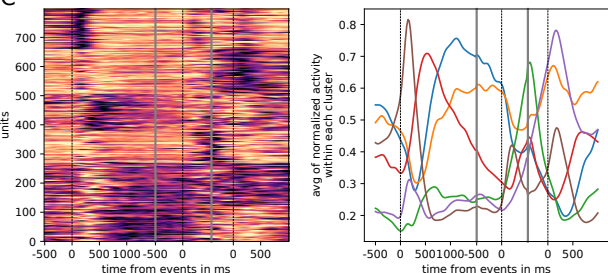

ACC

D

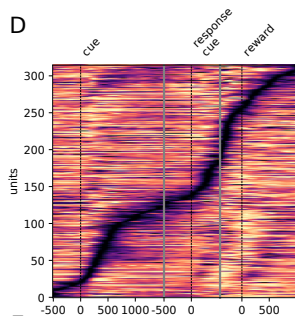

E

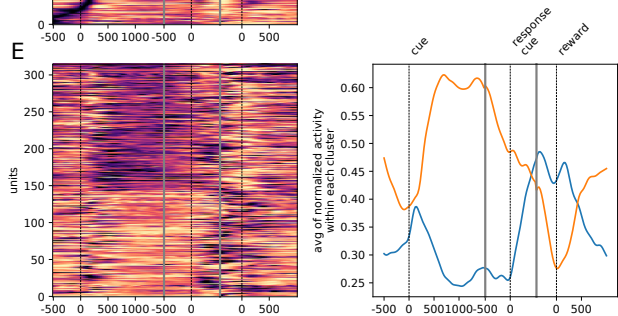

F

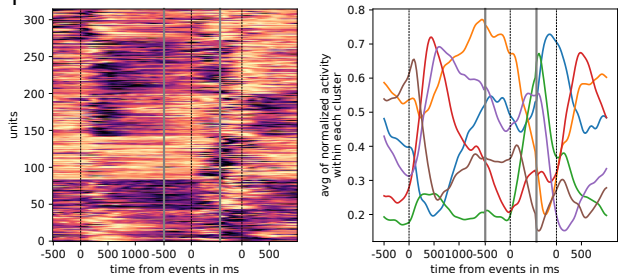

Supplement: supp [file elife-54313-supp-v1.zip]

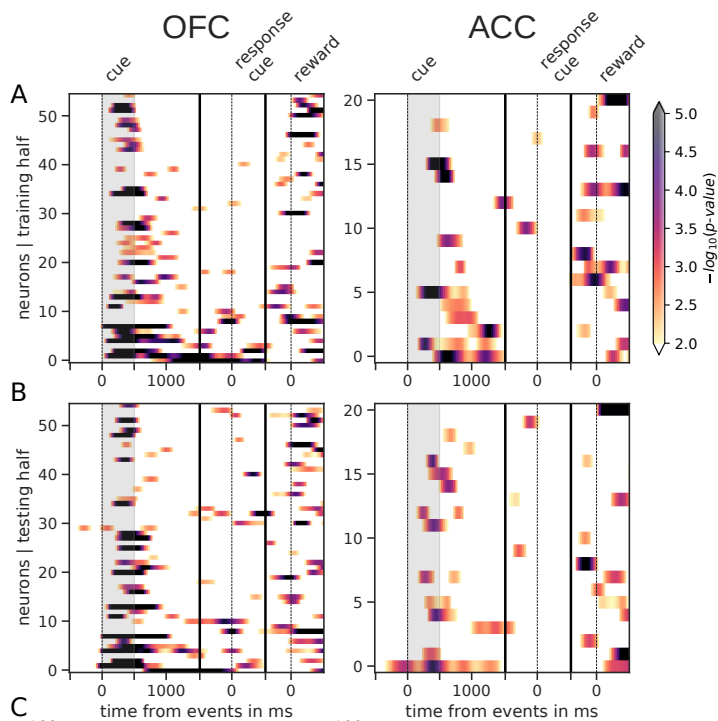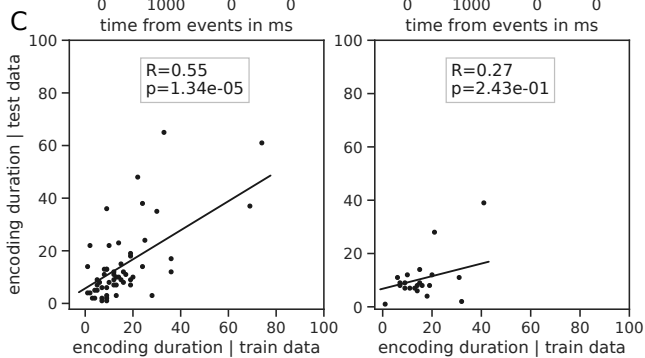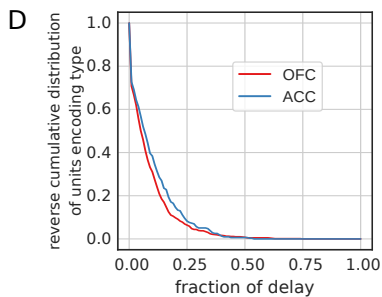

Supplement: supp [file elife-54313-supp-v1.zip]

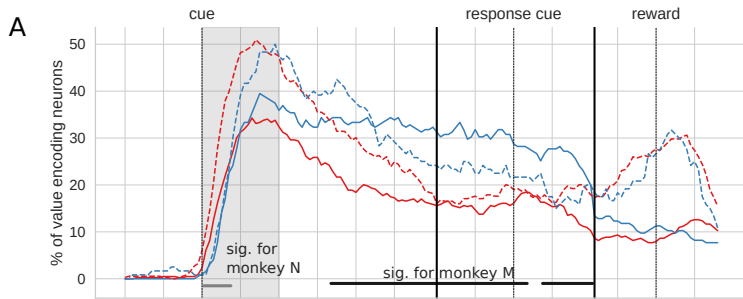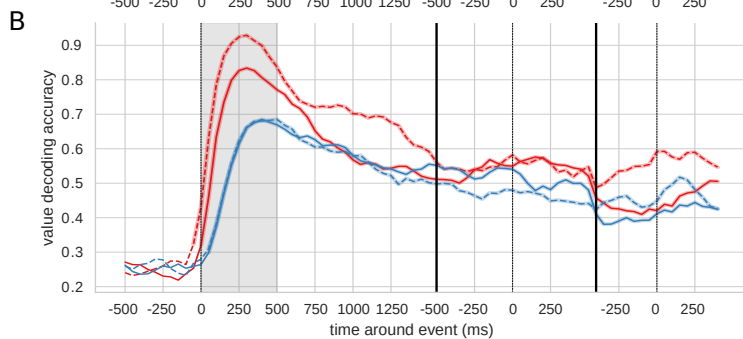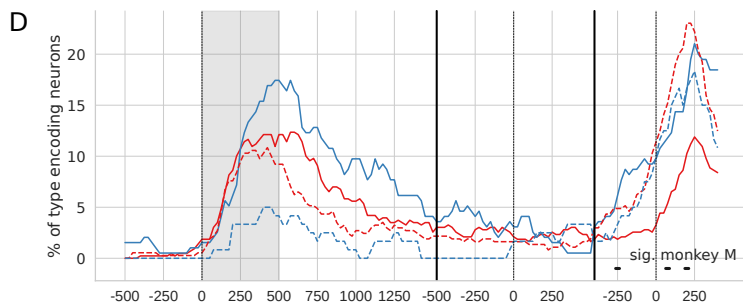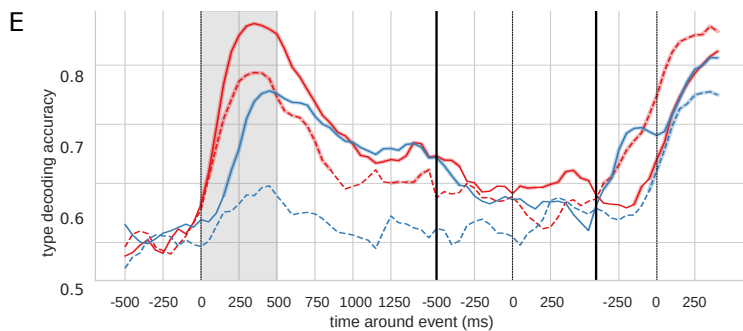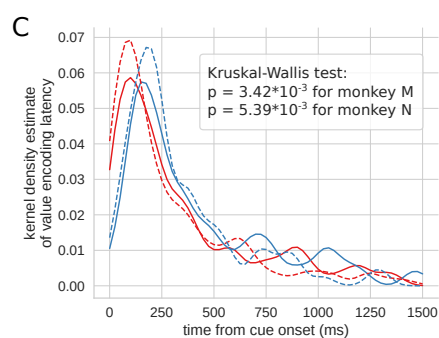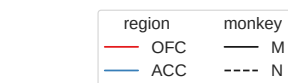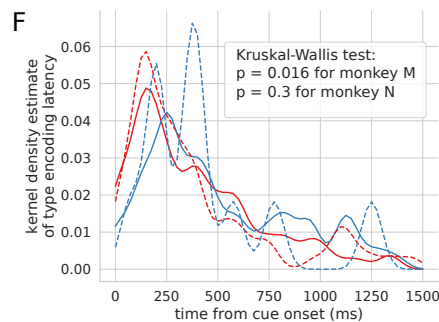

Supplement: supp [file elife-54313-supp-v1.zip]

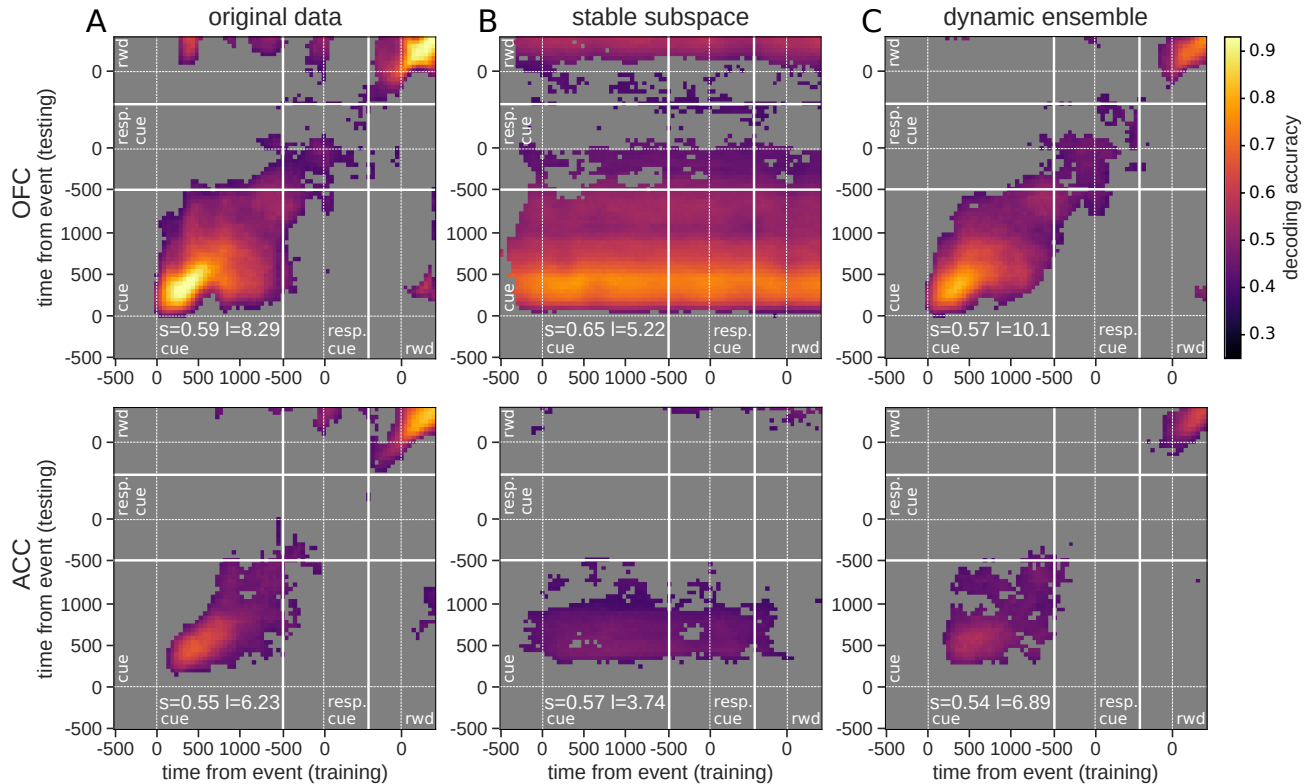

Supplement: supp [file elife-54313-supp-v1.zip]

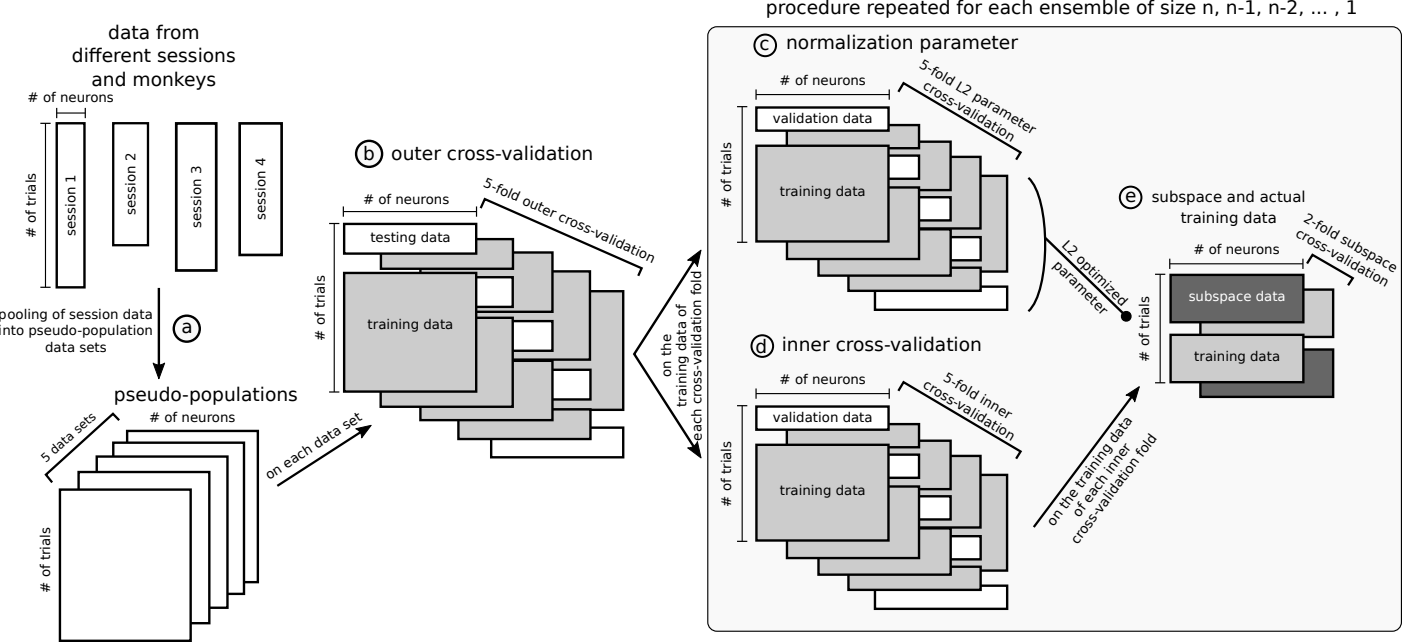

Supplement: supp [file elife-54313-supp-v1.zip]

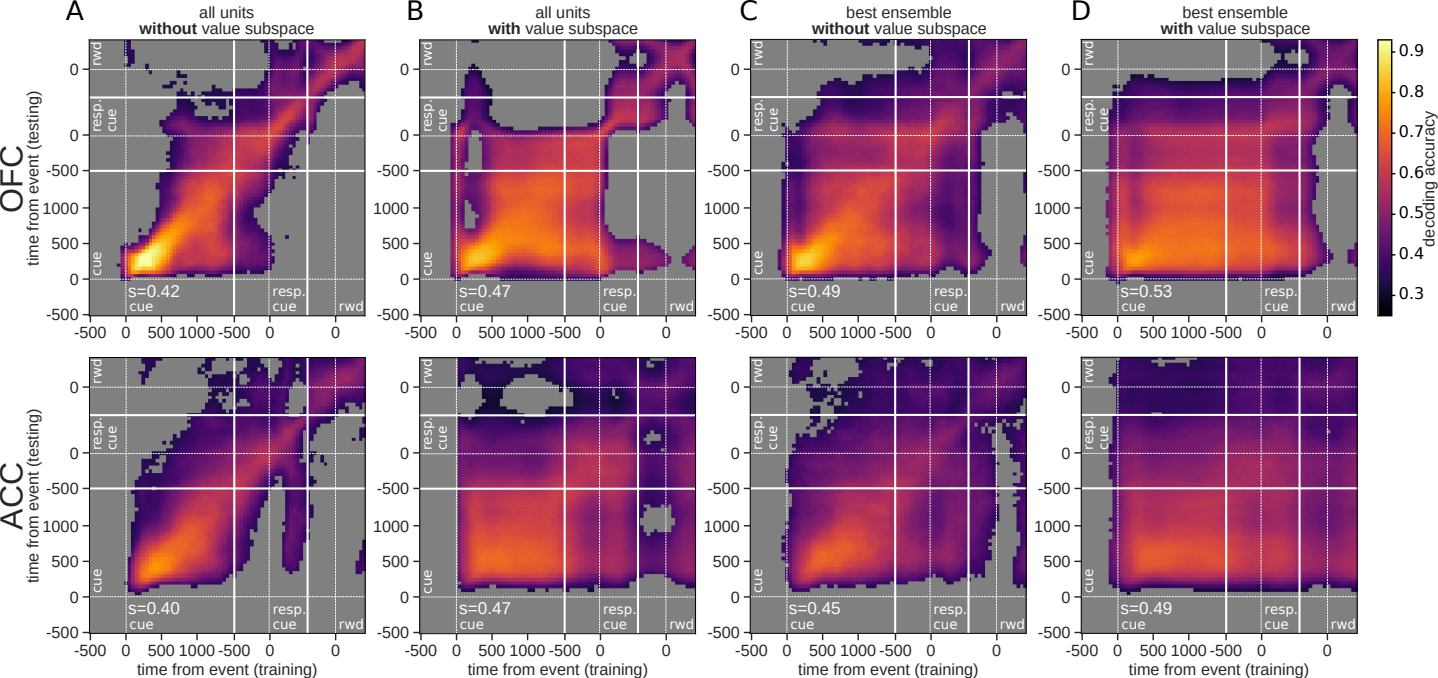

Supplement: supp [file elife-54313-supp-v1.zip]

OFC

response  
cue reward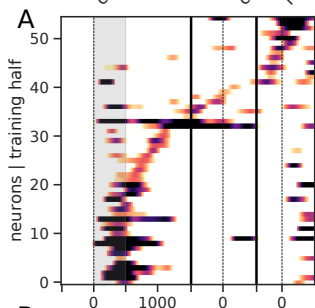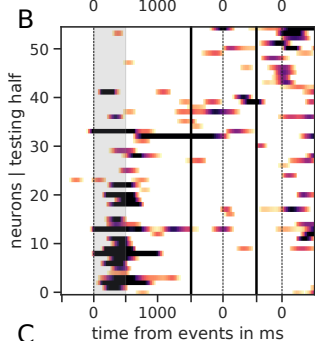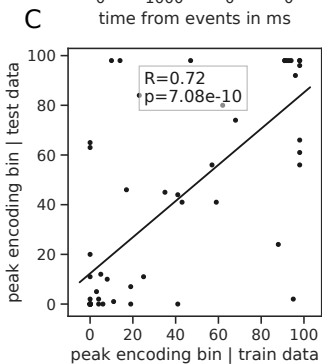

ACC

response  
cue reward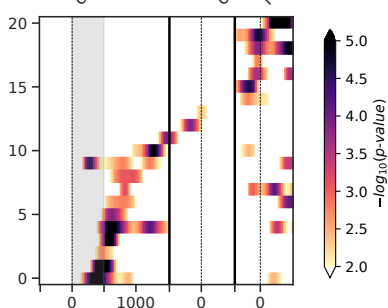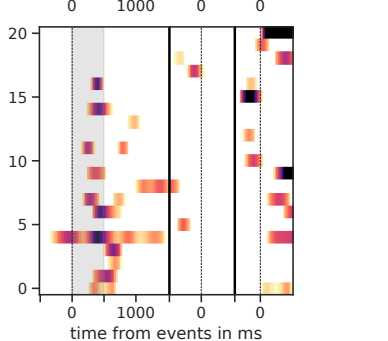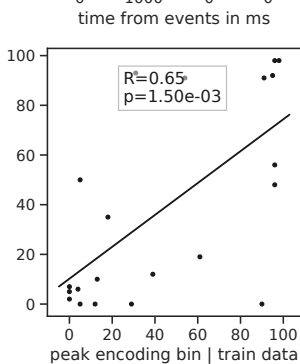

Supplement: supp [file elife-54313-supp-v1.zip]

original data

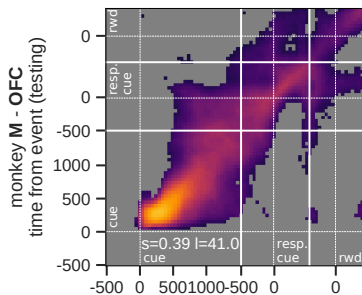

stable subspace

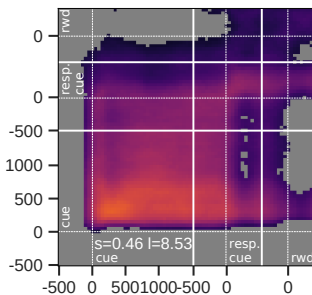

dynamic ensemble

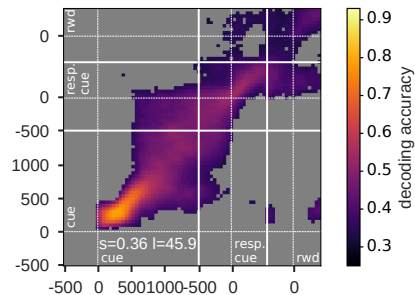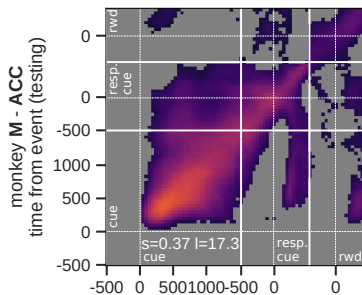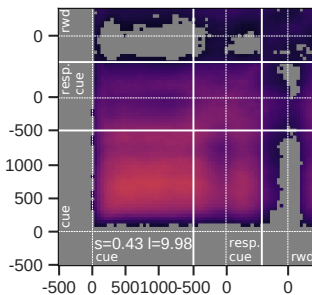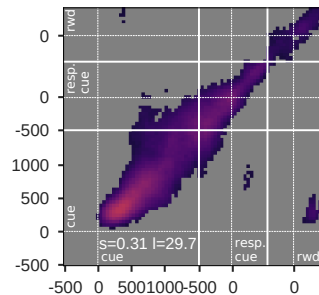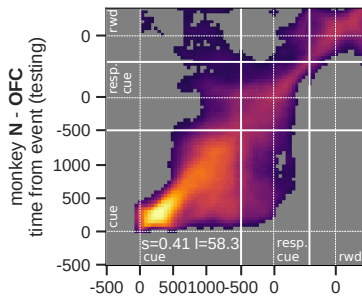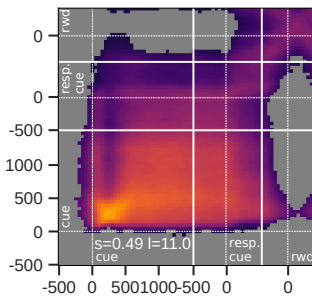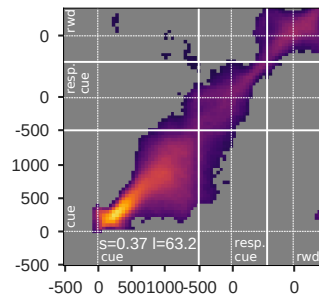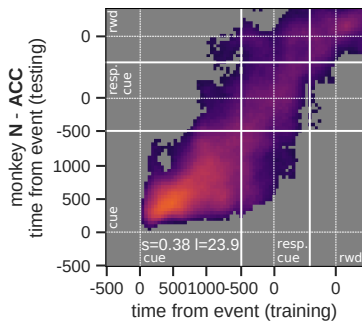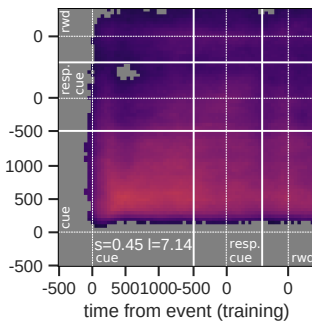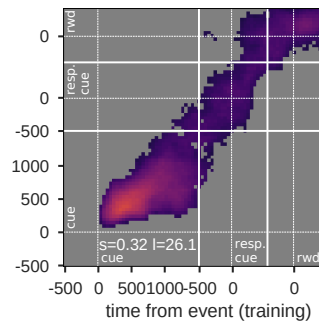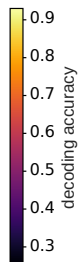

Supplement: supp [file elife-54313-supp-v1.zip]
